# Supplementary material
Source: Elsevier journal article supplement (https://www.sciencedirect.com/science/article/pii/S1413867021000775)
Supplement: mmc2 [file S1413867021000775:mmc2.docx]

**Supplementary File 2**

**Suppplementary Table**. **Characteristics of included and excluded patients. Brazilian HIV/AIDS Cohort, 2003-16.**

|  | **Included** | | **Excluded** | | **p-value*** |
| --- | --- | --- | --- | --- | --- |
|  | **n** | **(%)** | **n** | **(%)** |
| **Gender** |  |  |  |  |  |
| Female | 2,328 | 34.6 | 664 | 34.1 | 0.640 |
| Male | 4,396 | 65.4 | 1,286 | 65.9 |
| Total | 6,724 | 100 | 1950 | 100.0 |  |
| **Age (years)** |  |  |  |  |  |
| 18 -| 25 | 567 | 8.4 | 155 | 7.9 | 0.814 |
| 25 -| 30 | 1,105 | 16.4 | 312 | 16.0 |
| 30 -| 35 | 1,338 | 19.9 | 419 | 21.5 |
| 35 -| 40 | 1,231 | 18.3 | 354 | 18.2 |
| 40 -| 45 | 1,030 | 15.3 | 287 | 14.7 |
| 45 -| 50 | 699 | 10.4 | 207 | 10.6 |
| 50 -| 90 | 754 | 11.3 | 216 | 11.1 |
| Total | 6,724 | 100 | 1,950 | 100.0 |  |
| **Skin colour** |  |  |  |  |  |
| White | 3,257 | 48.4 | 960 | 49.2 | 0.926 |
| Black | 1,000 | 14.9 | 296 | 15.2 |
| Brown | 1,433 | 21.3 | 407 | 20.9 |
| Other | 38 | 0.6 | 10 | 0.5 |
| No information | 996 | 14.8 | 277 | 14.2 |
| Total | 6,724 | 100 | 1950 | 100.0 |  |
| **HIV exposure category** |  |  |  |  |  |
| Heterosexual | 3,554 | 52.9 | 1028 | 52.7 | 0.729 |
| Homosexual | 1,327 | 19.7 | 374 | 19.2 |
| Bisexual | 463 | 6.9 | 138 | 7.1 |
| Not specified | 286 | 4.3 | 86 | 4.4 |
| UDI | 204 | 3 | 58 | 3.0 |
| Vertical transmission | 19 | 0.3 | 11 | 0.6 |
| Transfusion / blood products | 81 | 1.2 | 20 | 1.0 |
| No information | 790 | 11.7 | 235 | 12.1 |
| Total | 6,724 | 100 | 1950 | 100.0 |  |
| **CD4+ T-cell count (per mm3)** |  |  |  |  |  |
| <200 | 3,512 | 52.2 | 1036 | 53.1 | 0.781 |
| 200 |-- 350 | 2,499 | 37.2 | 712 | 36.5 |
| >350 | 713 | 10.6 | 202 | 10.4 |
| Total | 6,724 | 100 | 1950 | 100 |  |
| **HIV viral load** |  |  |  |  |  |
| Undetectable | 153 | 2.3 | 47 | 2.4 | 0.396 |
| Detectable | 6,571 | 97.7 | 1903 | 97.6 |
| Total | 6,724 | 100 | 1950 | 100 |
| **Initial cART regimen** |  |  |  |  |  |
| 2 NRTI + 1 NNRTI | 4,562 | 67.8 | 1,318 | 67.6 | 0.912 |
| 2 NRTI + 1 PI/r | 899 | 13.4 | 275 | 14.1 |
| 2 NRTI + 1 PI | 599 | 8.9 | 177 | 9.1 |
| 2 NRTI + 2 PI | 220 | 3.3 | 62 | 3.2 |
| 2 NRTI + 2 PI/r | 279 | 4.1 | 76 | 3.9 |
| Other | 165 | 2.5 | 42 | 2.2 |
| Total | 6,724 | 100 | 1,950 | 100 |  |

*based on qui-square test.
